# Supplementary material for: Human management and hybridization shape treegourd fruits in the Brazilian Amazon Basin
Source: PubMed Central journal article supplement (PMC5469164; doi:10.1111/eva.12474), 2017-05-04

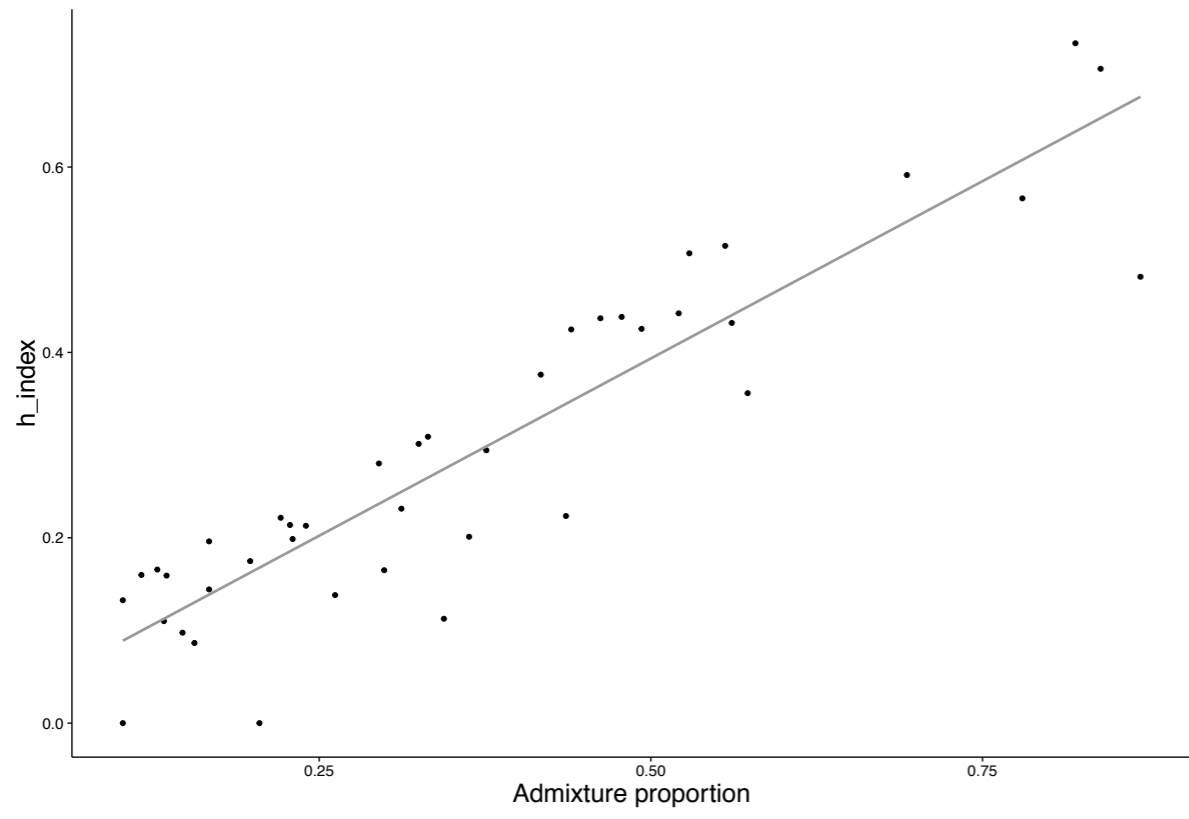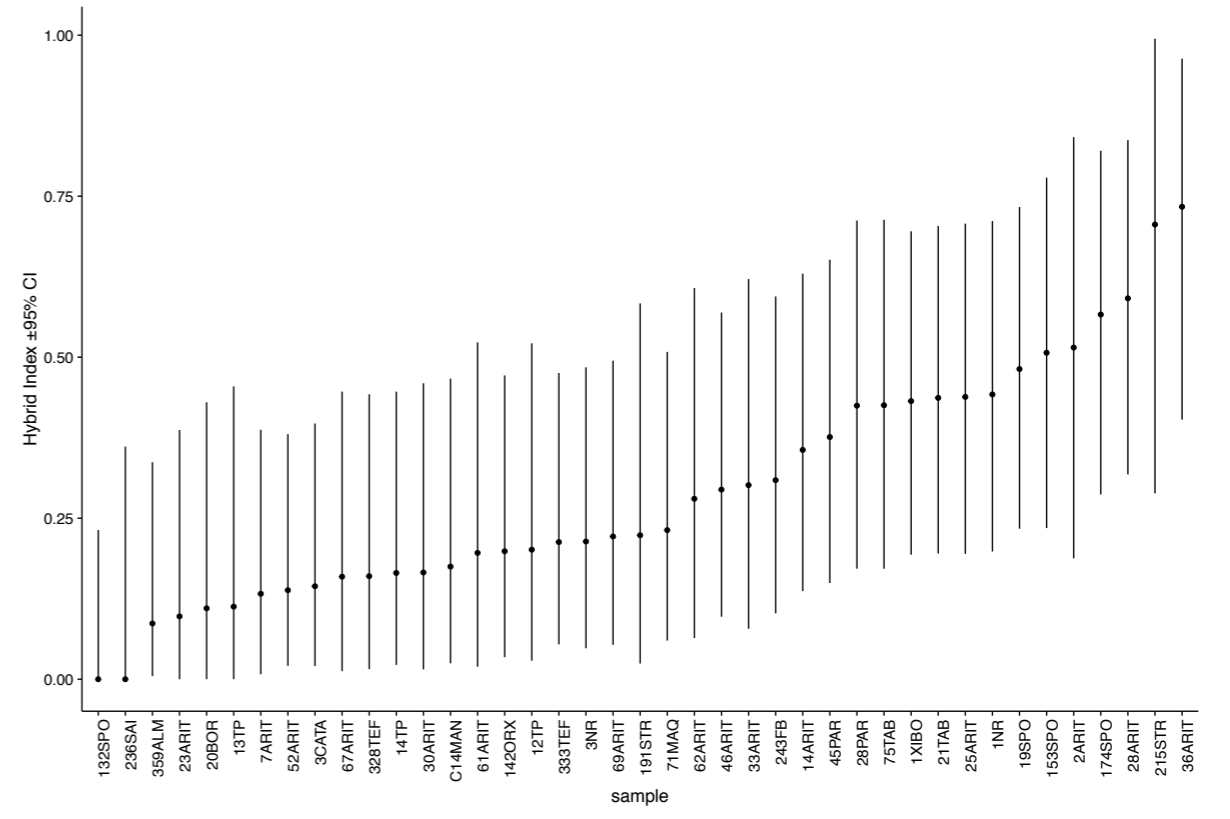

Supplement: EVA-10-577-s004.pdf [file EVA-10-577-s004.pdf]
